# Supplementary material
Source: Springer Nature journal article supplement (https://www.springermedizin.de/resource/supplementary/12936_2003_49_MOESM8_ESM.pdf/9546756)
Supplement: MOESM8 [file 9546756]

```

PfHsp90      -----
PfHsp90-2    MKLNNIYSFFFLFFVLCVIQENVRRVLCDS SVEGDKGPSDDVSDSSGKKEVSRDRDRTLE 60
HsHsp90      -----MPEET  5

PfHsp90      -----MSTETFAFNADIRQLMSLIINTFYSNKEIFLRE LISNASDALDKIRYESIT  51
PfHsp90-2    EIEEGEKPTESMESHQYQTEVTRLMDIIVNSLYTQKEVFLRE LISNAADALEKIRFLSLS 120
HsHsp90      QTQDQPMEEEEVETFAFQAEIAQLMSLIINTFYSNKEIFLRE LISNSSDALDKIRYESLT  65

      . *. : : : : : *: : *: * : * : * : * : * : * : * : * : * : * : * :
      .

PfHsp90      DTQKLSAEPEFFIRIIPDKTNNTLTIEDSGIGMTKNDLINNLGTIARSGTKAFMEAIQ-A 110
PfHsp90-2    DESVLGEEKKLEIRISANKEKNILSITDTGIGMTKVDLNNLGTIAKSGTNSNFLEAISK 180
HsHsp90      DPSKLD SGKELHINLIPNKQDRTLTIVDTGIGMTKADLINNLGTIAKSGTKAFMEALQ-A 124
      :  . *      : : *. : . : * .. * : * : : * * * * * * * * * * * * * * * * * : * : * : :

PfHsp90      SGDISMIGQF G VGFYSAYLVADHV V V I SKNNDD EQYVWESAAGGSFTVTKDETNEKLG 170
PfHsp90-2    GGDMSLIGQF G VGFYS AFLVADKVI VYTKNNDD EQYIWESTADAKFTIYKDPRGATL 240
HsHsp90      GADISMIGQF G VGFYSAYLVAEKVTVITKHNDD EQYAWESSAGGSFTVRTDTG-EPMGR 183
      .. * : * : * : * : * : * : * : * : * : * : * : * : * : * : * : * : * : * :

PfHsp90      TKIILHLKEDQLEYLEEKRIKDLVKKHSEFISFPIKLYCERQNEKEITASEEEEEGEGEGE 230
PfHsp90-2    TRISLHLKEDATNLLNDKKLMDLISKYSQFIQFPIYLLHENVYTEEVLADIAKDMVN--- 297
HsHsp90      TKVILHLKEDQTEYLEERRIKEIVKKHSQFIGYPITLFEKERDKEVSDDEAEK----- 238
      * : : * : * : * : * : * : * : * : * : * : * : * : * : * : * :

```
